# Supplementary material
Source: PubMed Central journal article supplement (PMC6774847)
Supplement: NIHMS1536702-supplement-1.pdf [file NIHMS1536702-supplement-1.pdf]

### Affected Breeds

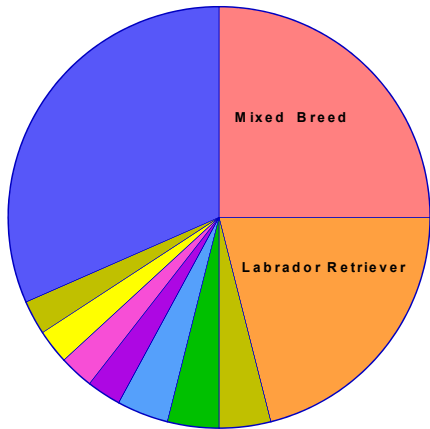

Total=76

- Mixed (25.00%)
- Labrador Retriever (21.05%)
- Bichon Frise (3.95%)
- Cocker Spaniel (3.95%)
- Miniature Schnautzer (3.95%)
- Shih Tzu (2.63%)
- Basset Hound(2.63%)
- Boston terrier(2.63%)
- Golden Retriever (2.63%)
- Other Purbreds of n=1 (31.58%)

### Age at Diagnosis

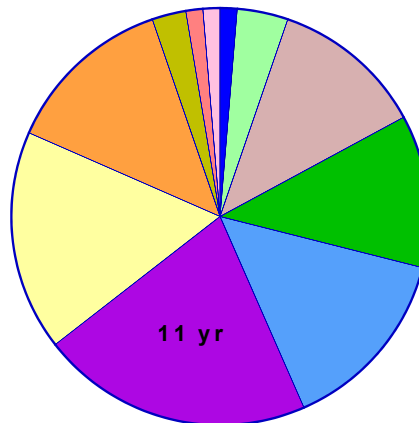

Total=76

- 6 yr (1.32%)
- 7 yr(3.95%)
- 8 yr (11.84%)
- 9 yr (11.84%)
- 10 yr (14.47%)
- 11 yr (21.05%)
- 12 yr(17.11%)
- 13 yr (13.16%)
- 14 yr (2.53%)
- 15 yr (1.32%)
- Unknown (1.32%)

### Primary Tumor location

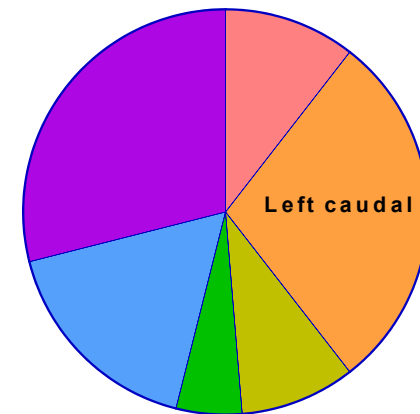

Total=76

- Left cranial lobe (10.53%)
- Left caudal lobe (28.95%)
- Right cranial lobe (9.21%)
- Right middle lobe(5.26%)
- Right caudal lobe (17.11%)
- Unspecified (28.95%)

### Sex Distribution

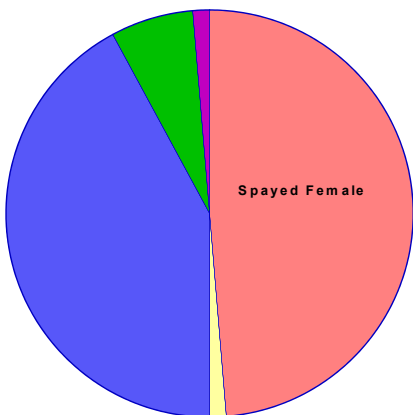

Total=76

- Spayed Female (48.68%)
- Unknown Female (1.32%)
- Castrated Male (42.11%)
- Intact Male (6.58%)
- Unknown (1.32%)

### Adenocarcinoma Subtype

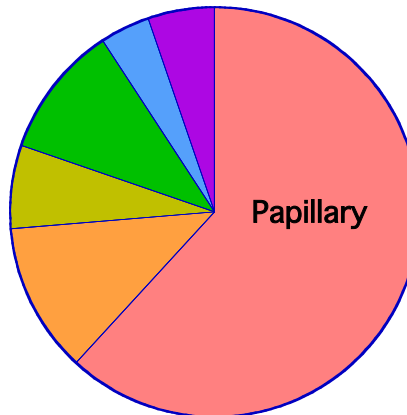

Total=76

- Papillary (61.84%)
- Tubulopapillary (11.84%)
- Mucinous Papillary( 6.58%)
- Acinar(10.53%)
- Solid (3.95%)
- Unspecified Subtype (5.26)

### Treatment

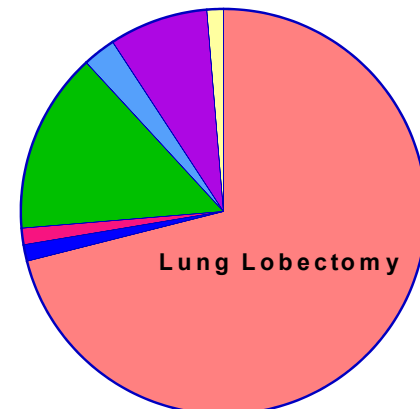

Total=76

- Lung lobectomy (71.05%)
- Vinorelbine only (1.32%)
- Lobectomy and radiation(1.32%)
- Lobectomy, cytotoxic chemo or toceranib (14.47%)
- None(2.63%)
- Unknown (7.89%)
- Other (1.32)

**Figure S1**
