# Supplementary material
Source: PubMed Central journal article supplement (PMC6774847)
Supplement: NIHMS1536702-supplement-7.pdf [file NIHMS1536702-supplement-7.pdf]

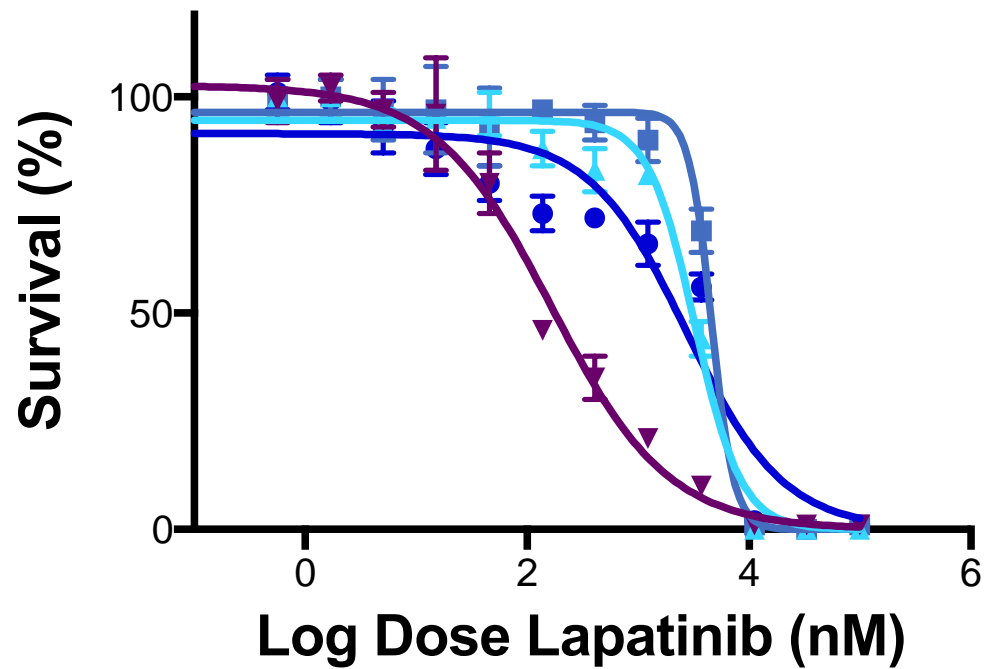

|   | Sample                                         | IC50 (nM) |
|---|------------------------------------------------|-----------|
| ● | BACA ( <i>HER2</i> <sup>WT</sup> )             | 2743      |
| ■ | OSUK9PADSnickers ( <i>HER2</i> <sup>WT</sup> ) | 4592      |
| ▲ | OSUK9PAPADOscar ( <i>HER2</i> <sup>WT</sup> )  | 3259      |
| ▼ | OSUK9PAPADReX ( <i>HER2</i> <sup>V659E</sup> ) | 167.6     |

Figure S7
