# Supplementary material
Source: PubMed Central journal article supplement (PMC6774847)
Supplement: NIHMS1536702-supplement-8.pdf [file NIHMS1536702-supplement-8.pdf]

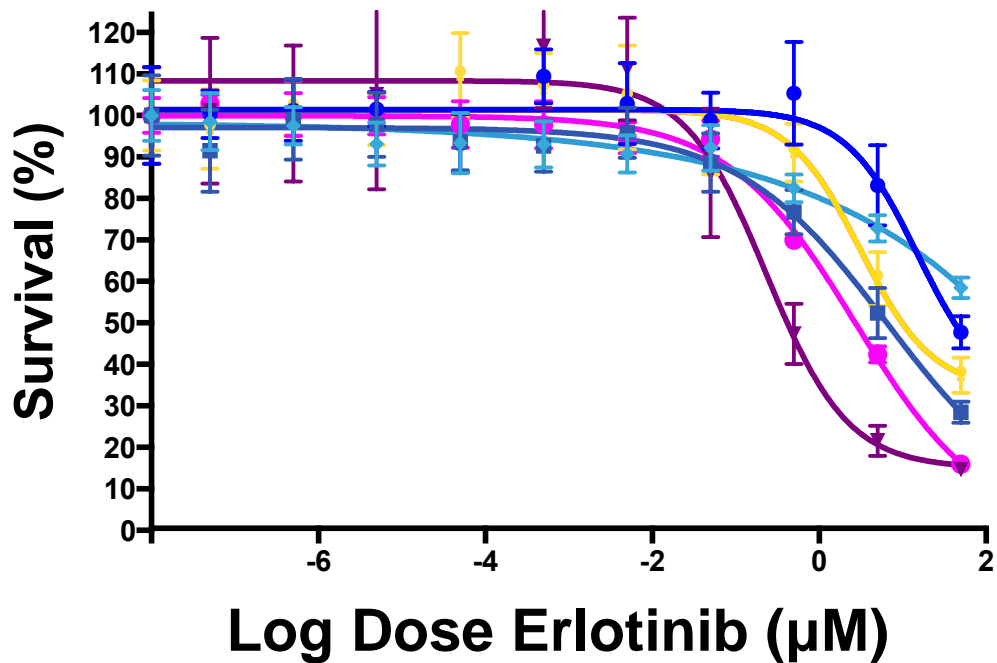

|   | Sample                                           | IC50 (nM) |
|---|--------------------------------------------------|-----------|
| ● | BACA ( <i>HER2</i> <sup>WT</sup> )               | 15380     |
| ■ | OSUK9PADSnickers ( <i>HER2</i> <sup>WT</sup> )   | 1920      |
| ★ | OSUK9PAPADOscar ( <i>HER2</i> <sup>WT</sup> )    | 1100      |
| ▼ | OSUK9PAPADReX ( <i>HER2</i> <sup>V659E</sup> )   | 220       |
| ● | OSUK9PAPADRiley ( <i>HER2</i> <sup>V659E</sup> ) | 1170      |
| ■ | BT474 ( <i>HER2</i> <sup>amp</sup> )             | 3130      |

Figure S8
