# Supplementary material
Source: PubMed Central journal article supplement (PMC6774847)
Supplement: NIHMS1536702-supplement-9.pdf [file NIHMS1536702-supplement-9.pdf]

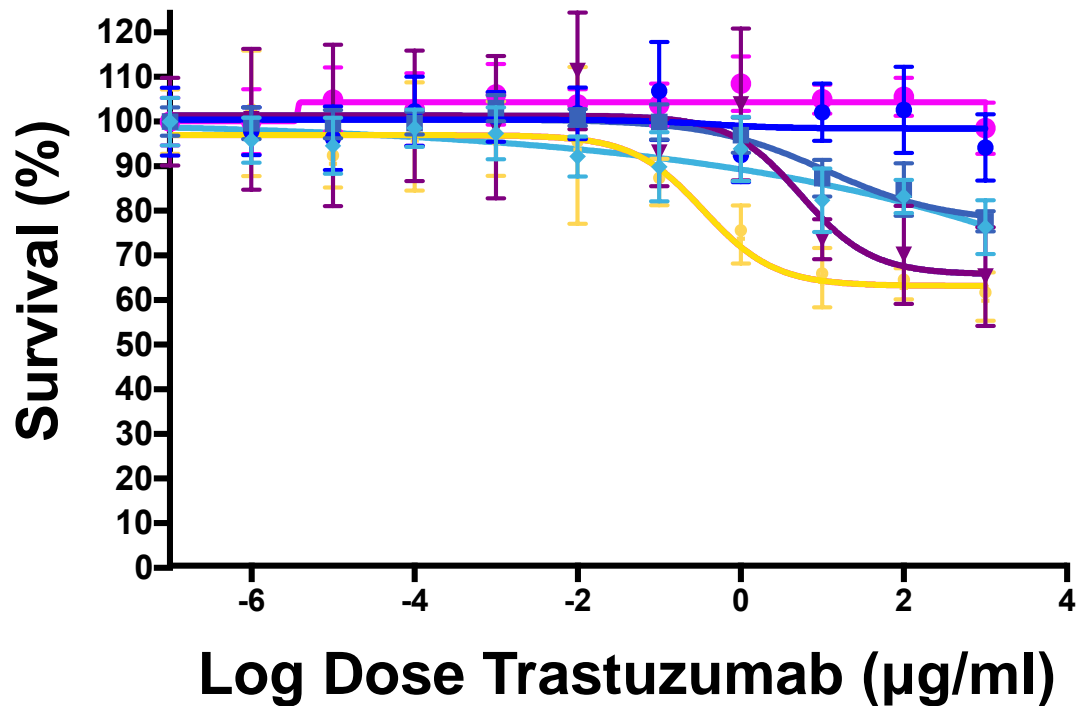

|                                                                                    | Sample                             | Growth Inhibition Relative to BT474 |
|------------------------------------------------------------------------------------|------------------------------------|-------------------------------------|
|    | BACA ( $HER2^{WT}$ )               | -0.05                               |
|    | OSUK9PADSnickers ( $HER2^{WT}$ )   | 0.37                                |
|  | OSUK9PAPADOscar ( $HER2^{WT}$ )    | 0.51                                |
|  | OSUK9PAPADReX ( $HER2^{V659E}$ )   | 0.75                                |
|  | OSUK9PAPADRiley ( $HER2^{V659E}$ ) | -0.14                               |
|  | BT474 ( $HER2^{amp}$ )             | 1                                   |

Figure S9
