# Supplementary material
Source: PubMed Central journal article supplement (PMC6774847)

**Patient ID**

**Chromosome**

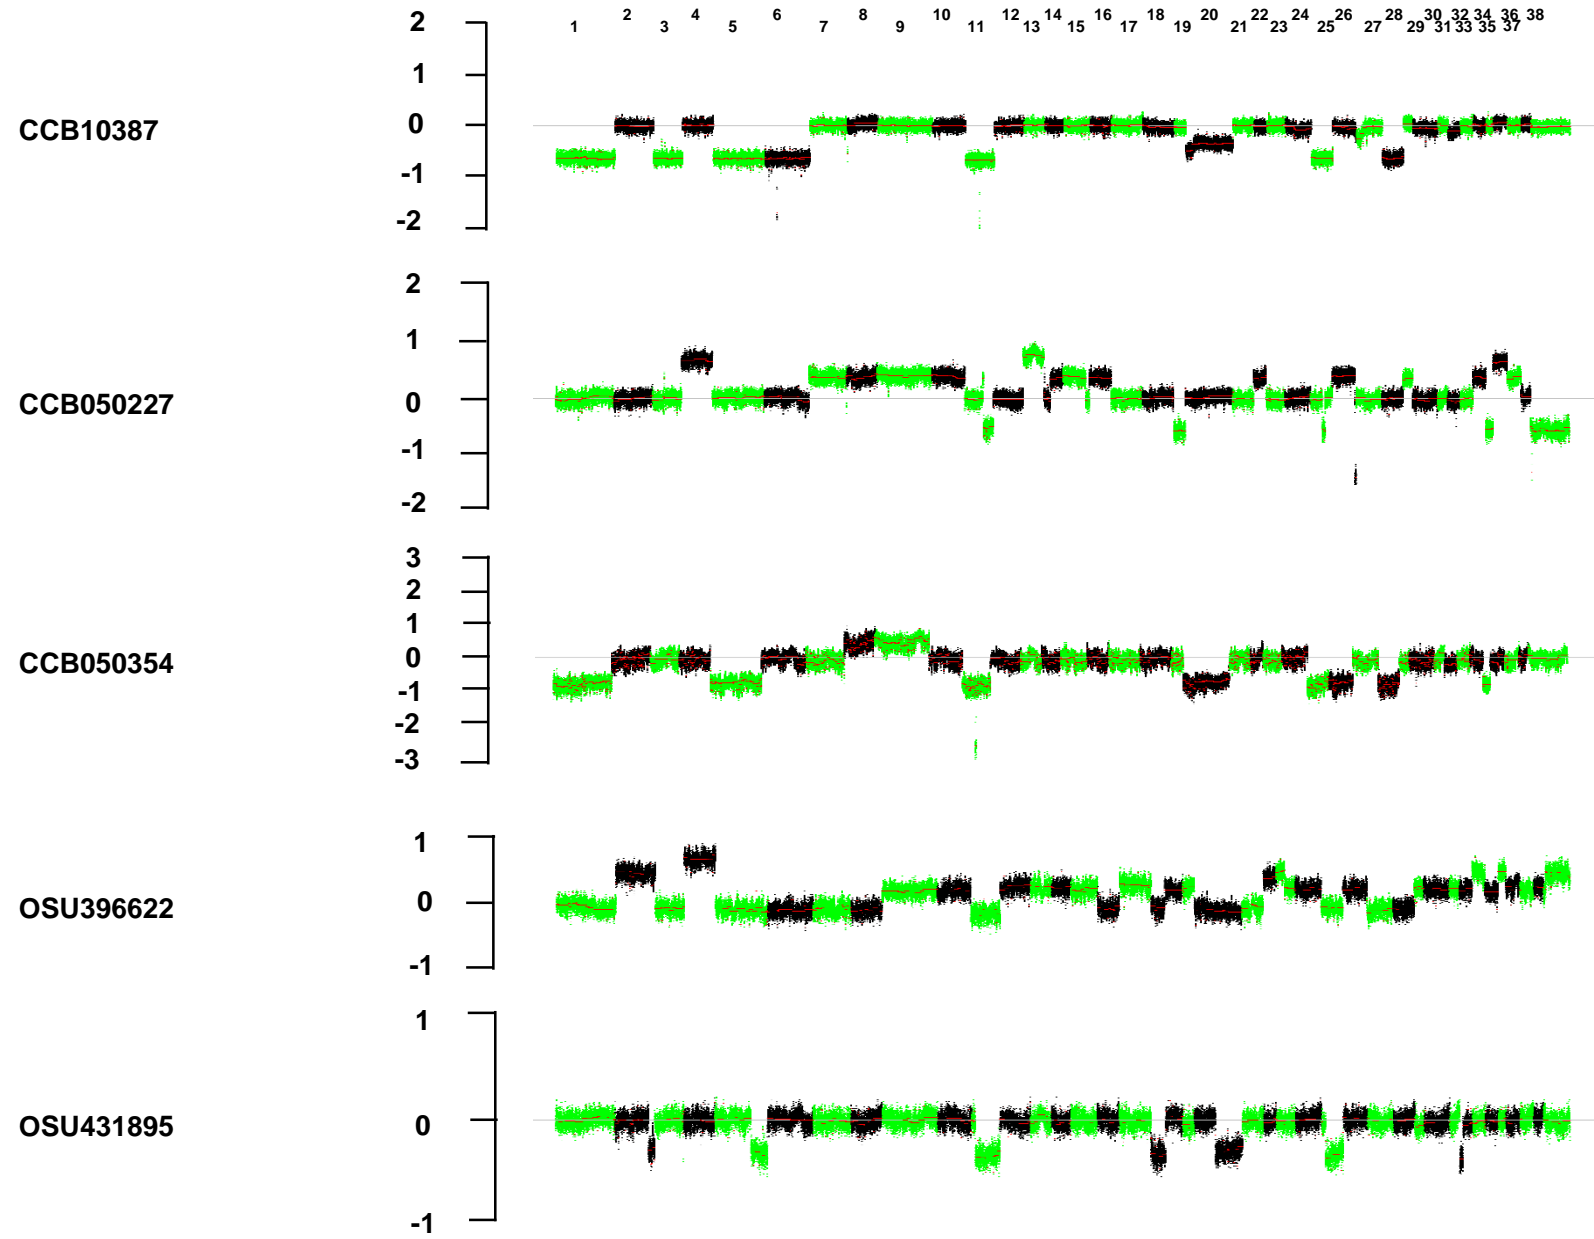

**Figure S2**

Supplement: NIHMS1536702-supplement-2.pdf [file NIHMS1536702-supplement-2.pdf]

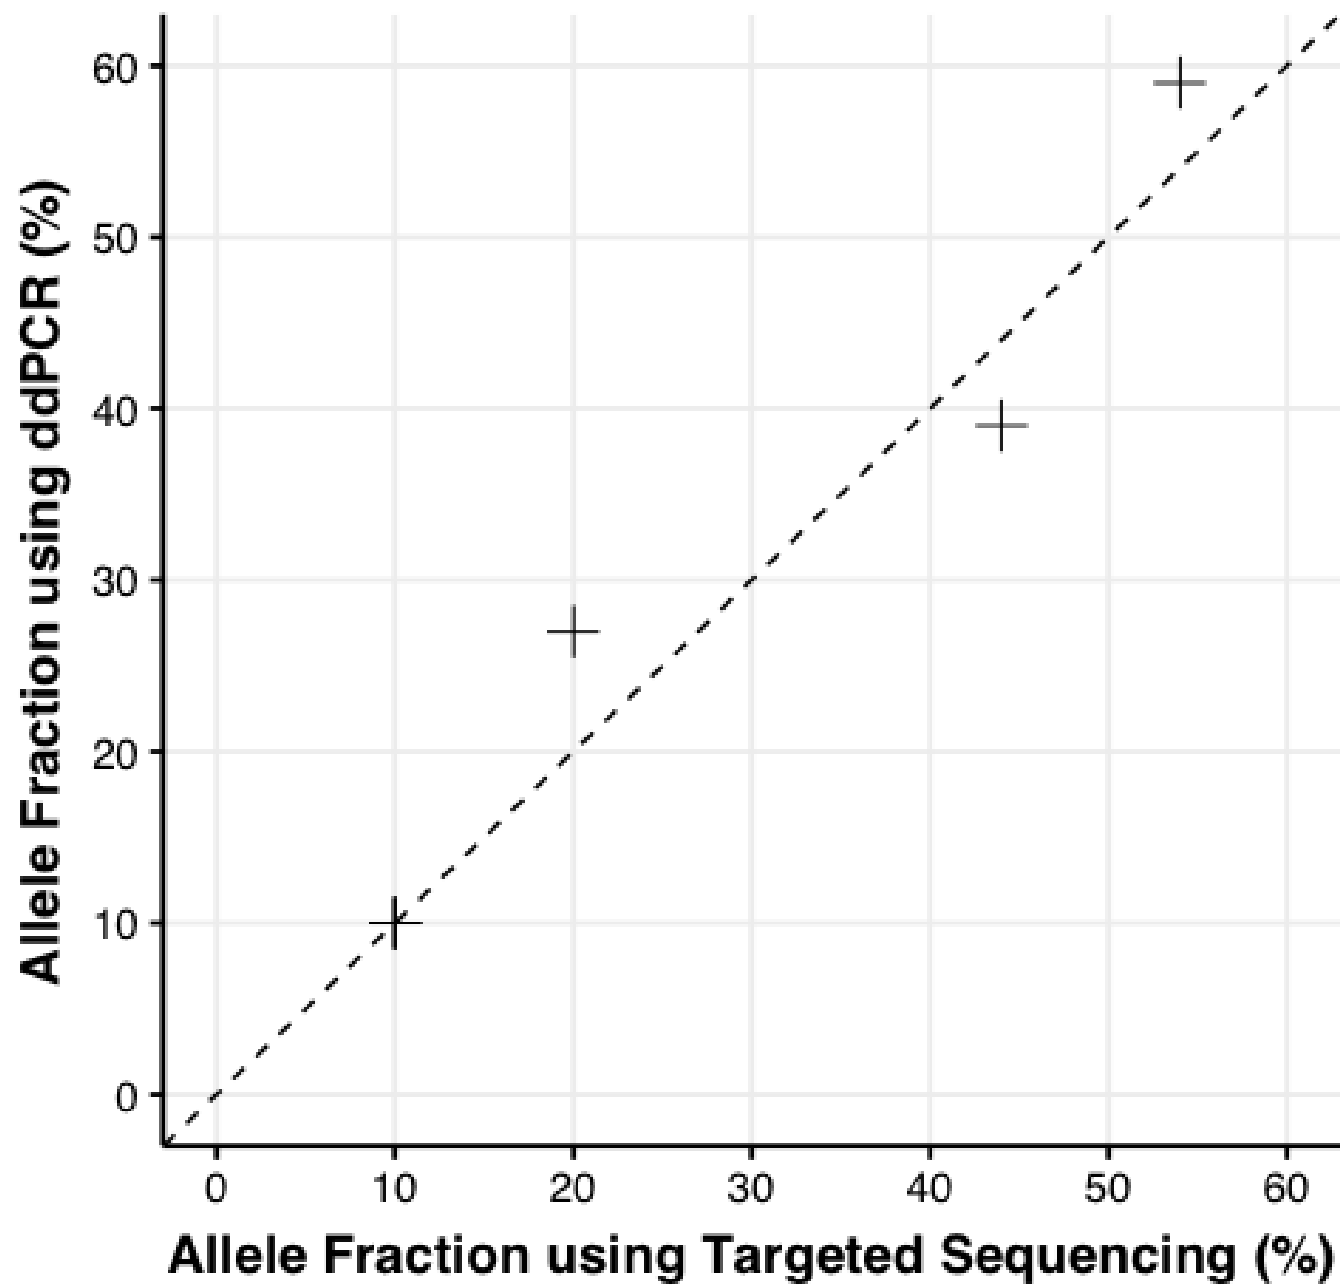

Figure S4

Supplement: NIHMS1536702-supplement-4.pdf [file NIHMS1536702-supplement-4.pdf]

**A**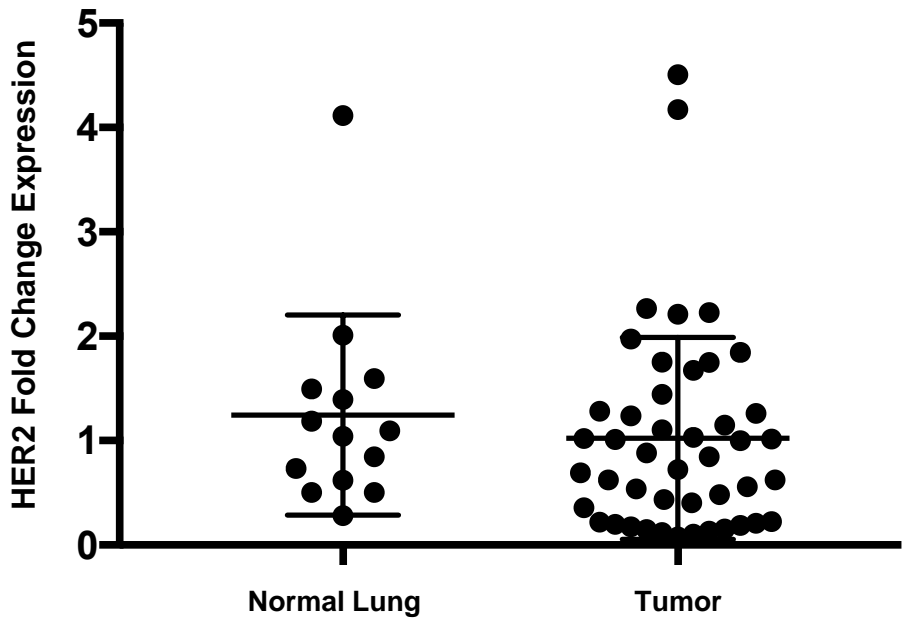**B**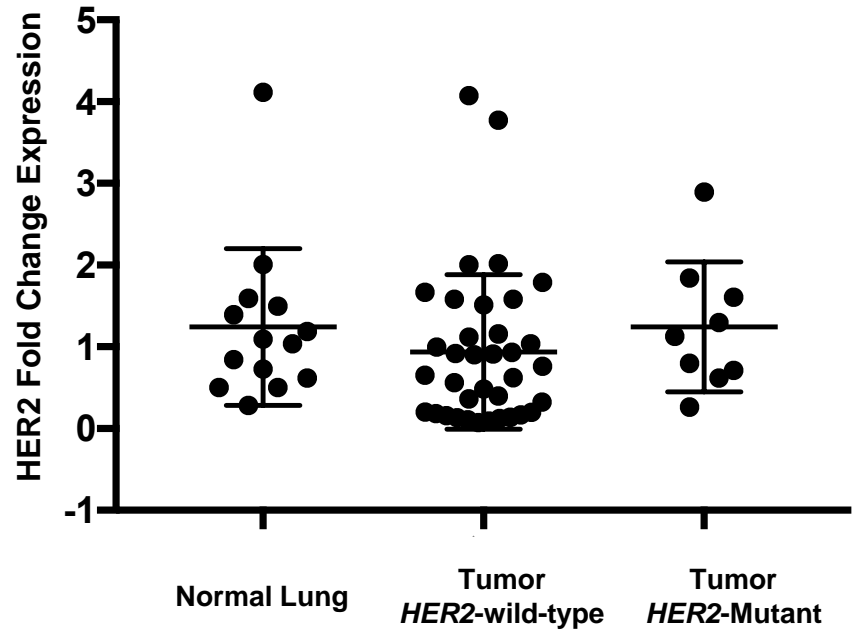**Figure S5**

Supplement: NIHMS1536702-supplement-5.pdf [file NIHMS1536702-supplement-5.pdf]

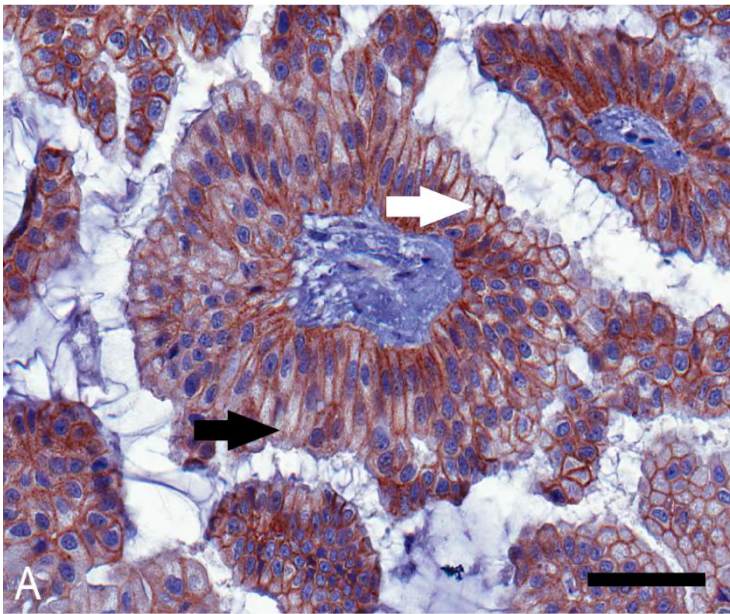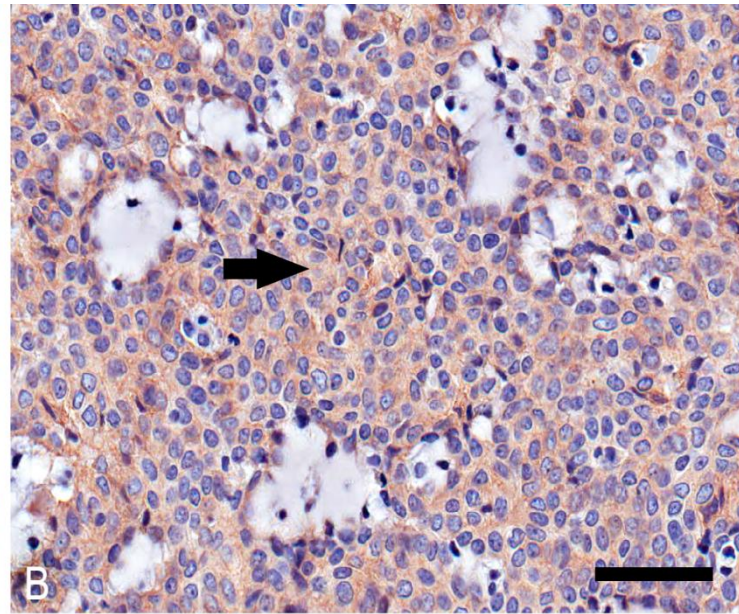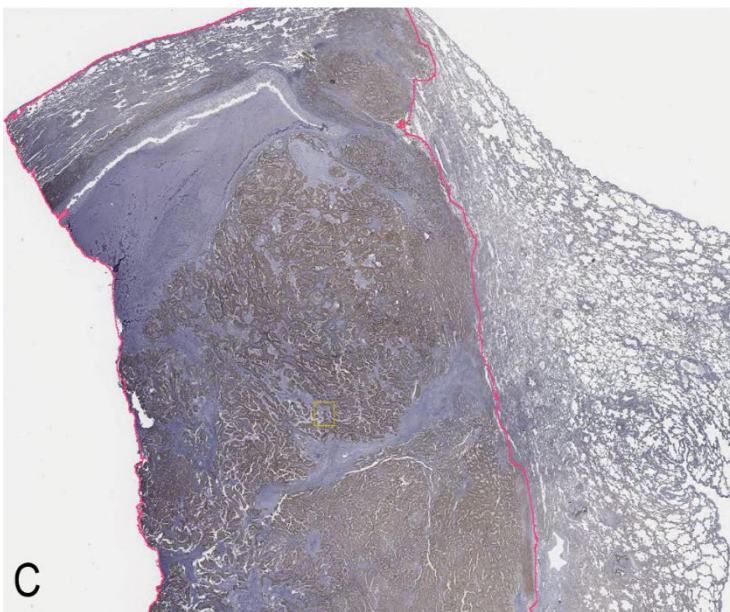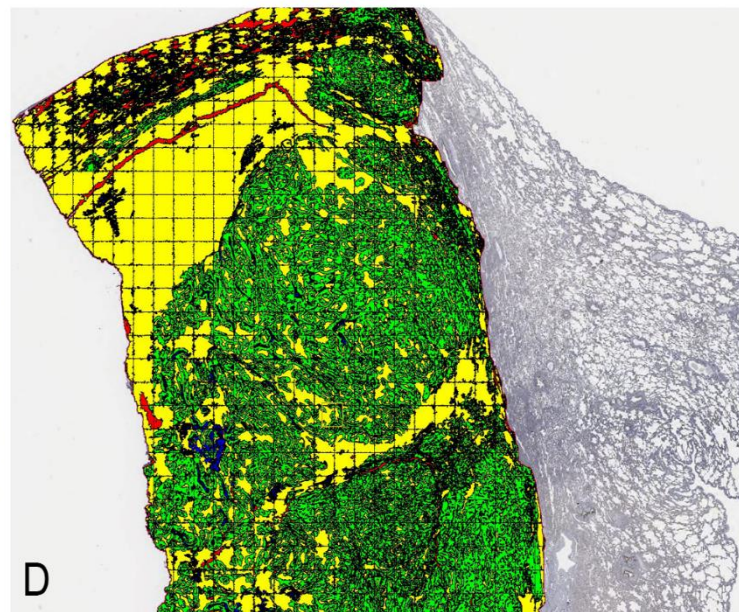

Figure S6

Supplement: NIHMS1536702-supplement-6.pdf [file NIHMS1536702-supplement-6.pdf]
